# Supplementary material for: Iron carbide and nitride via a flexible route: synthesis, structure and magnetic properties
Source: Royal Society of Chemistry journal article supplement (doi:10.1039/c5ra00336a), 2015-01-01
Supplement: c5ra00336a1.pdf [file c5ra00336a1.pdf]

## Iron Carbide and Nitride via a Flexible Route: Synthesis, Structure and Magnetic Properties

Peng Zhang, Xiaobai Wang, Wei Wang and Hua Yang\*

College of Chemistry, Jilin University, Changchun, 130012, China  
Email: huayang86@sina.com

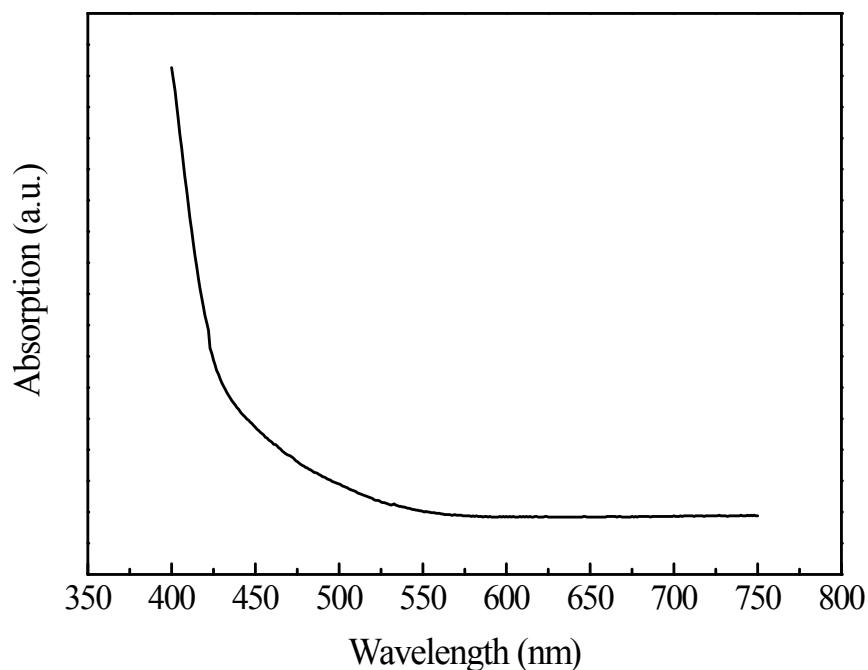

Fig. S1 UV-vis absorption spectrum of  $\text{FeCl}_3$  dissolved in ethanol

**Table 1** Magnetic properties of products at different ratio of  $\text{FeCl}_3$  to HMTA

| Ratio | Saturated Magnetization ( $M_S$ , emu/g) | remnant magnetization ( $M_R$ , emu/g) | Coercivity ( $H_C$ , Oe) |
|-------|------------------------------------------|----------------------------------------|--------------------------|
| 1:1   | 150.51                                   | 3.81                                   | 43.36                    |
| 1:3   | 53.03                                    | 5.91                                   | 274.30                   |
| 1:5   | 29.47                                    | 4.56                                   | 318.39                   |
| 1:10  | 16.24                                    | 3.12                                   | 324.68                   |
